# Supplementary material for: Phase I Study of Ficlatuzumab and Cetuximab in Cetuximab-Resistant, Recurrent/Metastatic Head and Neck Cancer
Source: MDPI journal article supplement (doi:10.3390/cancers12061537), 2020-06-11
Supplement: s1 [file s1]

## Supplementary Materials

# Phase I Study of Ficlatusumab and Cetuximab in Cetuximab-Resistant, Recurrent/Metastatic Head and Neck Cancer

Julie E. Bauman, James Ohr, William E. Gooding, Robert L. Ferris, Umamaheswar Duvvuri, Seungwon Kim, Jonas T. Johnson, Adam C. Soloff, Gerald Wallweber, John Winslow, Autumn Gaither-Davis, Jennifer R. Grandis and Laura P. Stabile

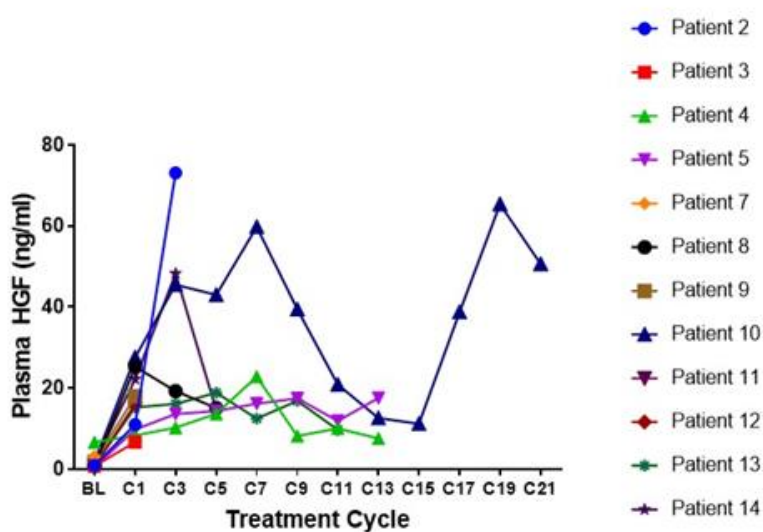

**Figure S1.** Mean plasma HGF levels (ng/mL) per patient and according to treatment cycle as measured by ELISA.

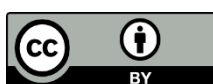

© 2020 by the authors. Licensee MDPI, Basel, Switzerland. This article is an open access article distributed under the terms and conditions of the Creative Commons Attribution (CC BY) license (<http://creativecommons.org/licenses/by/4.0/>).
